# Supplementary material for: Endoplasmic reticulum stress preconditioning attenuates methylmercury-induced cellular damage by inducing favorable stress responses
Source: PubMed Central journal article supplement — Sci Rep. 2013 Aug 2;3:2346. doi: 10.1038/srep02346 (PMC3731649; doi:10.1038/srep02346), 2013-08-02
Supplement: srep02346-s1.pdf [file srep02346-s1.pdf]

Endoplasmic reticulum stress preconditioning attenuates methylmercury-induced  
cellular damage by inducing favorable stress responses

Fusako Usuki<sup>1,\*</sup>, Masatake Fujimura<sup>2</sup>, Akio Yamashita<sup>3</sup>

<sup>1</sup>Department of Clinical Medicine, <sup>2</sup>Basic Medical Sciences, National Institute for  
Minamata Disease, 4058-18 Hama, Minamata 867-0008, Japan

<sup>3</sup>Department of molecular biology, Yokohama City University School of Medicine, 3-9  
Fuku-ura, Kanazawa, Yokohama 236-0004, Japan

\*To whom correspondence should be addressed. Tel: +81 966 63 3111; Fax: +81 966

61 1145; E-mail: [usuki@nimd.go.jp](mailto:usuki@nimd.go.jp)

**Fig. 1**

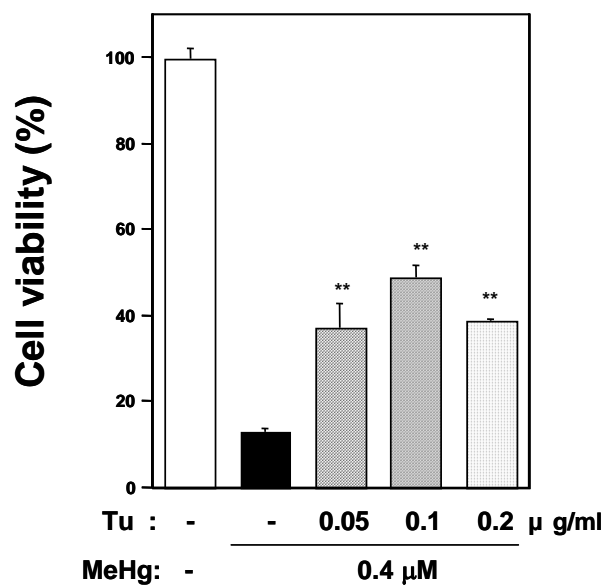

**Fig. 2**

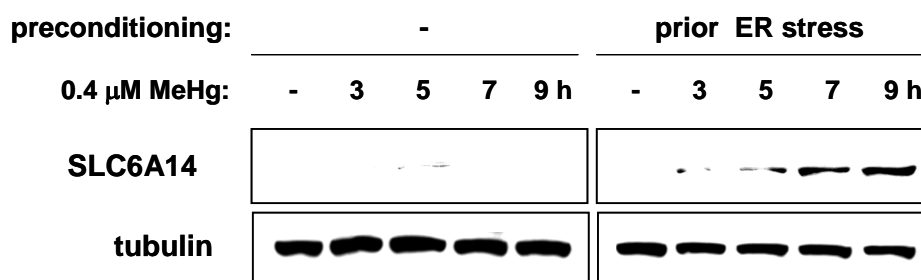

**Supplementary figure legends**

Fig. 1. Effect of pretreatment with tunicamycin (Tu) on MeHg cytotoxicity. Cell viability of C2C12-DMPK 160 cells pretreated with Tu 16 h before exposure to 0.5 μM MeHg was determined. Pretreatment with Tu (0.05-0.2 μg/ml) attenuated MeHg cytotoxicity. The viability of untreated cells was regarded as 100%. Values represent means ± SE (n=6). \*\*Significantly different from Tu-untreated cells by a one-way

ANOVA (\*\* $p < 0.01$ ).

Fig. 2. Effect of pretreatment with TPG on the expression of amino acid transporter SLC6A14. Western blots of C2C12-DMPK160 cells pretreated with 0.1  $\mu\text{g/ml}$  TPG for 16h were analyzed with the indicated antibody probes. Although cropped blots were used, the gels were run under the same experimental condition. Representative images of 3 samples are shown.
